# Supplementary material for: Spatial and Temporal Variations of Water Quality of Mateur Aquifer (Northeastern Tunisia): Suitability for Irrigation and Drinking Purposes
Source: Hindawi journal article supplement (doi:10.1155/2018/2408632), 2018-07-17
Supplement: f1 [file 2408632.f1.docx]

| **SI i** | **Cl** | | **SO4** | | **Ca** | | **Mg** | | **Na** | | **Sal** | | **NO3** | |
| --- | --- | --- | --- | --- | --- | --- | --- | --- | --- | --- | --- | --- | --- | --- |
| **N°** | W | D | W | D | W | D | W | D | W | D | W | D | W | D |
| **1** | 8.9 | 11.5 | 15.8 | 20.7 | 1.8 | 3.3 | 2.5 | 3.2 | 12.7 | 6.8 | 11.3 | 10.3 | 21.8 | 16.5 |
| **2** | 14.7 | 12.8 | 22.6 | 33.7 | 1.2 | 0.5 | 1.3 | 1.0 | 20.1 | 25.6 | 16.3 | 15.7 | 5.3 | 9.7 |
| **3** | 25.6 | 25.6 | 19.8 | 26.0 | 2.4 | 4.0 | 2.8 | 4.6 | 22.9 | 27.7 | 21.3 | 21.4 | 20.9 | 10.8 |
| **4** | 27.0 | 31.0 | 23.7 | 17.6 | 2.5 | 2.7 | 2.4 | 2.8 | 25.5 | 30.9 | 22.8 | 25.4 | 20.7 | 47.6 |
| **5** | 5.7 | 6.7 | 21.5 | 21.2 | 1.6 | 2.8 | 2.0 | 1.9 | 7.3 | 6.7 | 7.5 | 8.5 | 2.2 | 2.9 |
| **6** | 91.5 | 76.2 | 94.4 | 63.9 | 14.6 | 15.2 | 4.2 | 104.8 | 102.9 | 5.4 | 25.0 | 66.4 | 56.2 | 27.2 |
| **7** | 72.4 | 134.9 | 94.4 | 136.5 | 14.6 | 23.2 | 7.3 | 9.2 | 71.3 | 122.7 | 61.6 | 101.8 | 30.1 | 6.5 |
| **8** | 11.6 | 26.7 | 23.5 | 20.8 | 3.4 | 2.7 | 3.3 | 1.8 | 12.6 | 24.4 | 14.7 | 15.8 | 42.7 | 23.5 |
| **9** | 7.4 | 9.4 | 23.9 | 25.1 | 4.3 | 3.0 | 3.1 | 1.1 | 12.5 | 8.2 | 10.9 | 10.8 | 43.9 | 25.5 |
| **10** | 9.7 | 12.1 | 30.0 | 14.4 | 3.3 | 2.8 | 2.5 | 1.2 | 16.8 | 8.9 | 12.8 | 13.0 | 69.8 | 56.9 |
| **11** | 91.5 | 167.3 | 15.9 | 20.3 | 0.6 | 4.0 | 4.2 | 7.2 | 102.9 | 155.8 | 61.6 | 112.1 | 1.0 | 1.4 |
| **12** | 7.1 | 13.5 | 25.2 | 28.0 | 3.0 | 3.1 | 1.8 | 2.1 | 8.7 | 14.1 | 10.1 | 14.3 | 7.6 | 10.6 |
| **13** | 4.2 | 4.0 | 11.4 | 12.5 | 1.8 | 3.0 | 0.8 | 0.7 | 4.2 | 4.8 | 4.7 | 6.2 | 19.4 | 1.9 |
| **14** | 2.6 | 4.0 | 9.4 | 12.9 | 1.9 | 2.3 | 0.9 | 1.4 | 3.0 | 2.4 | 4.1 | 5.5 | 1.4 | 2.1 |
| **15** | 21.6 | 27.0 | 13.7 | 24.1 | 4.9 | 5.3 | 3.6 | 3.6 | 17.8 | 27.6 | 20.3 | 23.1 | 49.5 | 42.3 |
| **16** | 24.6 | 24.3 | 25.9 | 27.9 | 3.7 | 0.3 | 3.3 | 9.2 | 19.6 | 15.3 | 21.4 | 20.8 | 38.0 | 39.6 |
| **17** | 25.2 | 31.0 | 13.2 | 36.8 | 3.3 | 5.7 | 3.6 | 3.2 | 22.9 | 23.2 | 21.4 | 24.8 | 39.0 | 42.2 |
| **18** | 10.7 | 27.0 | 25.9 | 47.4 | 6.1 | 8.9 | 2.4 | 5.2 | 12.7 | 19.0 | 13.6 | 27.8 | 35.1 | 20.8 |
| **19** | 20.0 | 26.3 | 19.9 | 15.7 | 4.6 | 7.1 | 2.8 | 3.9 | 19.8 | 17.2 | 27.2 | 20.3 | 83.0 | 84.7 |
| **20** | 34.0 | 40.5 | 47.8 | 46.2 | 7.0 | 10.7 | 5.7 | 6.7 | 28.9 | 32.0 | 35.1 | 36.7 | 7.5 | 1.5 |
| **21** | 9.2 | 8.6 | 16.1 | 15.9 | 2.1 | 1.9 | 1.8 | 1.2 | 9.6 | 9.1 | 9.8 | 11.1 | 38.6 | 46.9 |
| **22** | 18.9 | 47.2 | 18.5 | 14.1 | 1.8 | 5.2 | 1.2 | 2.4 | 23.6 | 42.0 | 17.4 | 33.6 | 1.5 | 1.6 |
| **23** | 23.5 | 23.3 | 23.7 | 19.4 | 6.1 | 2.6 | 3.1 | 3.0 | 18.8 | 19.8 | 21.7 | 21.4 | 47.1 | 6.2 |
| **24** | 8.8 | 9.4 | 11.2 | 10.3 | 1.6 | 1.9 | 1.7 | 1.5 | 9.8 | 8.3 | 11.2 | 11.7 | 5.5 | 8.5 |
| **25** | 47.9 | 66.1 | 88.6 | 66.6 | 8.5 | 10.7 | 8.5 | 10.3 | 47.1 | 59.7 | 39.7 | 50.6 | 0.0 | 9.6 |
| **26** | 6.3 | 6.7 | 15.7 | 14.4 | 1.0 | 0.5 | 1.4 | 1.2 | 9.9 | 10.6 | 7.0 | 7.0 | 2.6 | 0.2 |
| **27** | 12.7 | 14.8 | 13.9 | 10.7 | 2.1 | 2.1 | 1.8 | 1.5 | 11.1 | 13.9 | 11.4 | 13.2 | 3.6 | 3.0 |
| **28** | 76.2 | 25.8 | 63.9 | 50.8 | 3.7 | 9.4 | 5.5 | 4.9 | 104.5 | 30.1 | 66.4 | 66.4 | 81.9 | 1.9 |
| **29** | 8.5 | 14.8 | 35.5 | 32.4 | 2.9 | 6.3 | 3.6 | 3.7 | 10.0 | 5.9 | 13.2 | 16.0 | 82.6 | 52.2 |
| **30** | 15.2 | 20.2 | 27.4 | 44.8 | 5.9 | 5.6 | 4.3 | 4.7 | 17.2 | 15.4 | 17.8 | 21.1 | 7.0 | 30.6 |
| **F1** | 13.2 | 8.2 | 18.2 | 9.2 | 2.2 | 1.9 | 2.4 | 2.1 | 11.9 | 7.6 | 12.8 | 13.7 | 5.8 | 4.3 |
| **F2** | 9.4 | 12.1 | 11.3 | 23.5 | 5.2 | 1.6 | 1.7 | 1.5 | 7.6 | 8.9 | 11.1 | 12.2 | 14.7 | 25.2 |
| **F3** | 4.3 | 6.7 | 13.1 | 13.6 | 1.9 | 1.7 | 1.2 | 0.9 | 4.5 | 7.9 | 8.5 | 8.2 | 41.6 | 30.3 |
| **F4** | 3.9 | 5.4 | 8.5 | 11.0 | 1.5 | 1.5 | 0.9 | 0.8 | 4.4 | 4.9 | 7.4 | 7.3 | 34.3 | 32.2 |
| **F5** | 27.4 | 28.3 | 15.3 | 19.4 | 3.3 | 3.4 | 4.2 | 2.9 | 25.4 | 25.8 | 21.7 | 22.6 | 20.2 | 10.1 |
| **F7** | 11.5 | 9.2 | 10.0 | 11.7 | 3.1 | 4.3 | 1.3 | 1.3 | 18.2 | 8.6 | 10.4 | 10.5 | 32.7 | 36.5 |
| **F8** | 7.1 | 16.7 | 16.1 | 8.4 | 2.0 | 0.9 | 2.1 | 1.8 | 8.8 | 14.1 | 6.1 | 12.4 | 5.2 | 7.6 |
| **F10** | 8.4 | 8.1 | 16.8 | 16.8 | 3.6 | 3.3 | 3.0 | 3.2 | 8.2 | 7.8 | 12.8 | 12.6 | 4.1 | 7.6 |
| **F11** | 10.7 | 12.1 | 16.1 | 21.7 | 2.7 | 4.9 | 2.2 | 4.2 | 8.7 | 6.8 | 11.3 | 12.7 | 12.7 | 10.8 |
| **F12** | 12.4 | 8.5 | 23.6 | 12.1 | 4.3 | 3.6 | 2.4 | 1.7 | 13.2 | 8.2 | 12.6 | 14.2 | 0.0 | 6.8 |

**SIi of major parameters during wet and dry seasons W :** Wet season **D :** Dry season
